# Supplementary material
Source: ML conference proceedings conference paper supplement (https://proceedings.neurips.cc/paper_files/paper/2015/hash/e94550c93cd70fe748e6982b3439ad3b-Abstract.html)
Supplement: Supplementary file [file e94550c93cd70fe748e6982b3439ad3b-Supplemental.zip]

## A Proofs

*Proof of entropy relaxation.* We apply the entropy power inequality [6], which asserts that for independent  $d$ -dimensional random vectors  $\psi_{1:K}$ , the sum

$$\psi = \sum_{k=1}^K \psi_k$$

satisfies

$$e^{\frac{2h(\psi)}{d}} \geq \sum_{k=1}^K e^{\frac{2h(\psi_k)}{d}} \geq \max_{1 \leq k \leq K} e^{\frac{2h(\psi_k)}{d}}, \quad (10)$$

where  $h$  denotes differential entropy.

In our case, we have

$$\psi_k = F_k(\theta_k)$$

and

$$\psi = \theta = F(\theta_1, \dots, \theta_K)$$

Since

$$H[q] = h(\psi),$$

equation (10) implies

$$H[q] \geq \max_{1 \leq k \leq K} h(\psi_k) = \max_{1 \leq k \leq K} (H[p_k] + \mathbb{E}_{p_k}[\log \det J(F_k)(\theta_k)]).$$

Defining

$$\tilde{H}[q] = \frac{1}{K} \sum_{k=1}^K \mathbb{E}_{p_k}[\log \det J(F_k)(\theta_k)] + \min_{1 \leq k \leq K} H[p_k],$$

we immediately see that

$$H[q] \geq \tilde{H}[q],$$

as required.  $\square$

*Proof of Theorem 4.1.* We first define

$$\mathcal{L}_0(q) = \mathbb{E}_q[\log p(\theta, X) \mid \theta_{1:K}] = \log p(F(\theta_{1:K}), X).$$

Since  $\mathcal{L}(q) = \mathbb{E}_{p_{1:K}}[\mathcal{L}_0(q)]$ , where the expectation is taken with respect to the subposteriors, which do not vary with  $q$ , it suffices to show that  $\mathcal{L}_0$  is concave in each  $F^u$  individually for each fixed  $\theta_{1:K}$ . Furthermore, since  $F(\theta_{1:K})$  is linear in  $F$  by the definition of function addition, it actually suffices to show  $\ell(\theta) = \log p(F(\theta_{1:K}), X)$  in each  $\theta^u$  individually. To see why this holds, first observe that for each  $u \in V(G)$ , we have

$$\ell(\theta) = \log h^u(\theta^u) + \sum_{u' \in \text{par}(u)} \left( \theta^{u'} \right)^T T^{u' \rightarrow u} \left( \theta^{u'} \right) \quad (11)$$

$$+ \sum_{v \in \text{ch}(u)} \left[ \left( \theta^u \right)^T T^{u \rightarrow v} \left( \theta^v \right) - \log A^v \left( \theta^{\text{par}(v)} \right) \right] + c_u, \quad (12)$$

where  $c_u$  is a function of  $\theta$  that is constant in  $\theta^u$ . By the log-concavity assumption, the sum of the first two terms of  $\ell(\theta)$  in (12) is concave in  $\theta^u$ . On the other hand, by basic properties of exponential families, each  $\log A^v \left( \theta^{\text{par}(v)} \right)$  is convex in  $\theta^{\text{par}(v)}$  and hence in  $\theta^u$ , making its negative concave. Since the remaining terms are linear or constant,  $\ell$  is in fact concave in  $\theta^u$ . The claim follows.  $\square$

*Proof of Theorem 4.2.* Clearly it suffices to show that each  $\mathbb{E}_{p_k}[\log \det J(F_k)(\theta_k)]$  is concave and for this it suffices to show that for fixed  $\theta_k$ ,  $\log \det J(F_k)(\theta_k)$  is concave. This is immediate, however, since the Jacobian is a linear function and  $\log \det$  is a concave function.  $\square$

## B Variational objective functions

We derive the variational objectives and gradients for the models we analyze. Throughout, we make the convention that for  $A, B \in \mathbb{R}^{d \times d}$ ,

$$\langle\langle A, B \rangle\rangle = \text{Tr}(AB)$$

denotes the trace inner product.

## B.1 Bayesian probit regression

In this section, we compute the variational objective for the Bayesian probit regression model. For convenience, we define

$$\mu_k = \mathbb{E}_{p_k} [\beta_k] \quad \text{and} \quad S_k = \mathbb{E}_{p_k} [\beta_k \beta_k^T].$$

In this notation, the variational objective takes the simple form

$$\begin{aligned} \mathcal{L}(W) = & -\frac{1}{2\sigma^2} \sum_{k=1}^K \left[ \left\langle \left\langle S_k, W_k^T W_k \right\rangle \right\rangle + 2 \sum_{\ell \neq k} \left\langle \left\langle \mu_k \mu_\ell^T W_\ell^T, W_k \right\rangle \right\rangle \right] \\ & + \sum_{n=1}^N \left[ y_n \cdot \mathbb{E}_q [\log \Phi_n] + (1 - y_n) \cdot \mathbb{E}_q [\log (1 - \Phi_n)] \right] \\ & + \frac{1}{K} \sum_{k=1}^K \log \det (W_k) \end{aligned}$$

where  $\Phi_n = \Phi \left( \sum_k \langle W_k, \beta_k x_n^T \rangle \right)$ .

This leads to the gradients

$$\begin{aligned} \nabla_{W_k} \mathcal{L} = & \frac{1}{\sigma^2} \left[ S_k W_k^T + \sum_{\ell \neq k} \left( \mu_k \mu_\ell^T W_\ell^T + W_\ell \mu_\ell \mu_k^T \right) \right] \\ & + \sum_{n=1}^N \mathbb{E}_q \left[ \left( \frac{\phi_n}{\Phi_n (1 - \Phi_n)} \cdot (y_n - \Phi_n) \right) \cdot \beta_k \right] x_n^T \\ & + \frac{W_k^{-1}}{K}, \end{aligned}$$

where we have additionally defined  $\phi_n = \phi \left( \sum_{k=1}^K \langle W_k, \beta_k x_n^T \rangle \right)$  and

$$\beta = \sum_{k=1}^K W_k \beta_k.$$

## B.2 Normal-inverse Wishart model

The variational objective for the normal-inverse Wishart model takes the form

$$\mathcal{L}(W) = \mathbb{E}_q [\mathcal{L}_0(W, \Lambda_{1:K})] + \tilde{\mathbf{H}}[q],$$

where

$$\begin{aligned} \mathcal{L}_0(W) = & -\frac{1}{2} \sum_{k=1}^K \left\langle \left\langle R_k \left( V^{-1} + X^T X \right) R_k^T, W_k D_k \right\rangle \right\rangle \\ & + \frac{N}{2} \sum_{k=1}^K \left\langle \left\langle R_k \left( \mu \bar{x}^T + \bar{x} \mu^T \right), W_k D_k \right\rangle \right\rangle - \frac{N}{2} \sum_{k=1}^K \left\langle \left\langle (R_k \mu) (R_k \mu)^T, W_k D_k \right\rangle \right\rangle \\ & + \frac{\nu + N - d - 1}{2} \cdot \log \det \left( \sum_{k=1}^K R_k^T [W_k D_k] R_k \right), \end{aligned}$$

and we have compressed our notation by setting  $\mu = \sum_k A_k \mu_k$ ,  $\bar{x} = \frac{1}{N} \sum_n x_n$ ,  $R_k = R(\Lambda_k)$ , and  $D_k = D(\Lambda_k)$ . As before, we have

$$\tilde{\mathbf{H}}[q] = \frac{1}{K} \sum_{k=1}^K \log \det (W_k),$$

where we have suppressed the constant depending on the  $p_{1:K}$  since it does not vary with  $W_k$ .

Recalling that  $W_k$  is diagonal, we can obtain the gradients by first computing

$$\begin{aligned} \nabla_{W_k} \mathcal{L}_0(W) = & D_k \cdot \text{diag} \left[ R_k \left( V^{-1} + X^T X \right) R_k^T \right] \\ & + \frac{N}{2} \cdot D_k (R_k \mu \circ \bar{x} + R_k \bar{x} \circ \mu) - \frac{N}{2} \cdot D_k (R_k \mu) \circ (R_k \mu) \\ & + \frac{\nu + N - d - 1}{2} \cdot D_k \cdot \text{diag} \left[ R_k \left( \sum_{\ell=1}^K R_\ell^T [W_\ell D_\ell] R_\ell \right)^{-1} R_k^T \right], \end{aligned}$$

where we have used  $\circ$  to denote elementwise vector products. We then find

$$\nabla_{W_k} \mathcal{L} = \mathbb{E}_q [\nabla_{W_k} \mathcal{L}_0(W)] + \frac{W_k^{-1}}{K}.$$

### B.3 Mixture of Gaussians

Per the description of aggregation in Section 5, we define merged samples in the mixture of Gaussians model by the equations

$$\theta_\ell^* = F_{a_\ell}(\theta_{1:K,1:L}) = \sum_{k=1}^K W_{k\ell} \theta_{ka_{k\ell}},$$

where  $\ell = 1, \dots, L$  denotes the cluster index and  $a_k$  denotes the alignment mapping indices on the master core to indices on worker core  $k$ . Throughout this section, we treat the alignment variables as fixed.

Using this notation, we define

$$\mathcal{L}_0(W, \theta_{1:K,1:L}) = -\frac{1}{2\tau^2} \sum_{\ell=1}^L \|\theta_\ell^*\|_2^2 - \frac{1}{2\sigma^2} \sum_{\ell=1}^L \sum_{i=1}^n \gamma_{i\ell}(W) \|\theta_\ell^* - x_i\|_2^2,$$

where

$$\gamma_{n\ell} = \frac{\tilde{\gamma}_{n\ell}}{\sum_{\ell'=1}^L \tilde{\gamma}_{n\ell'}}$$

and

$$\tilde{\gamma}_{n\ell} = \exp\left(-\frac{1}{2\sigma^2} \|\theta_\ell^* - x_n\|_2^2\right).$$

The variational objective then takes the form

$$\mathcal{L}(W) = \mathbb{E}_{p_{1:K}} [\mathcal{L}_0(W, \theta_{1:K,1:L})] + \tilde{\mathbf{H}}[q],$$

with the usual equation

$$\tilde{\mathbf{H}}[q] = \frac{1}{K} \sum_{k=1}^K \sum_{\ell=1}^L \log \det(W_{k\ell}).$$

Some calculation then shows that the gradients with respect to the various  $W_{k\ell}$  are given by

$$\begin{aligned} \nabla_{k\ell} \mathcal{L}_0(W, \theta_{1:K,1:L}) &= \frac{1}{2\sigma^4} \sum_{n=1}^N \gamma_{n\ell} (1 - \gamma_{i\ell}) \|\theta_\ell^* - x_n\|_2^2 \cdot \theta_{ka_{k\ell}} (\theta_\ell^* - x_n)^T \\ &\quad - \left( \frac{1}{\tau^2} + \frac{\sum_{n=1}^N \gamma_{n\ell}}{\sigma^2} \right) \cdot \theta_{ka_{k\ell}} (\theta_\ell^* - \tilde{x}_\ell)^T, \end{aligned}$$

where

$$\tilde{x}_\ell = \left( \frac{1}{\tau^2} + \frac{\sum_{n=1}^N \gamma_{n\ell}}{\sigma^2} \right)^{-1} \sum_{n=1}^N \frac{\gamma_{n\ell}}{\sigma^2} \cdot x_n.$$

This covers the case of general PSD matrices  $W_{k\ell}$ . When the matrices are restricted to be diagonal, we get the simplified gradient

$$\begin{aligned} \nabla_{k\ell} \mathcal{L}_0(W, \theta_{1:K,1:L}) &= \frac{1}{2\sigma^4} \sum_{n=1}^N \gamma_{i\ell} (1 - \gamma_{n\ell}) \|\theta_\ell^* - x_n\|_2^2 \cdot \theta_{ka_{k\ell}} \circ (\theta_\ell^* - x_n) \\ &\quad - \left( \frac{1}{\tau^2} + \frac{\sum_{n=1}^N \gamma_{n\ell}}{\sigma^2} \right) \cdot \theta_{ka_{k\ell}} \circ (\theta_\ell^* - \tilde{x}_\ell), \end{aligned}$$

where  $\circ$  denotes elementwise multiplication of vectors.

Since

$$\nabla_{k\ell} \mathcal{L}(W) = \mathbb{E}_{p_{1:K}} [\nabla_{k\ell} \mathcal{L}(W, \theta_{1:K,1:L})] + \frac{W_{k\ell}^{-1}}{K},$$

this gives us all the information we need to implement an optimization procedure for the objective.

## C Extended empirical evaluation

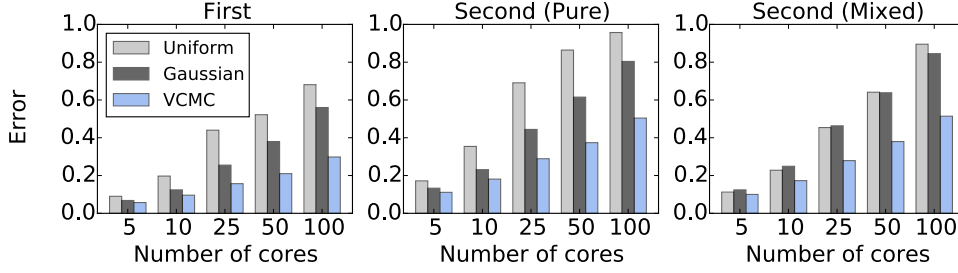

Figure 4: Five-dimensional probit regression ( $d = 5$ ). Moment approximation error for the uniform and Gaussian averaging baselines and VCMC, relative to serial MCMC. We assessed three groups of functions: (*left*) first moments, with  $f(\beta) = \beta_j$  for  $1 \leq j \leq d$ ; (*center*) pure second moments, with  $f(\beta) = \beta_j^2$  for  $1 \leq j \leq d$ ; and (*right*) mixed second moments, with  $f(\beta) = \beta_i \beta_j$  for  $1 \leq i < j \leq d$ .

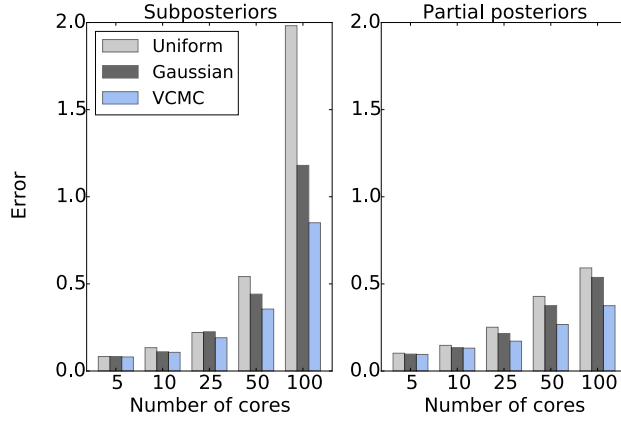

Figure 5: High-dimensional probit regression ( $d = 300$ ). Moment approximation error for the uniform and Gaussian averaging baselines and VCMC, relative to serial MCMC, for subposteriors (*left*) and partial posteriors (*right*). Here we show the pure second moments.

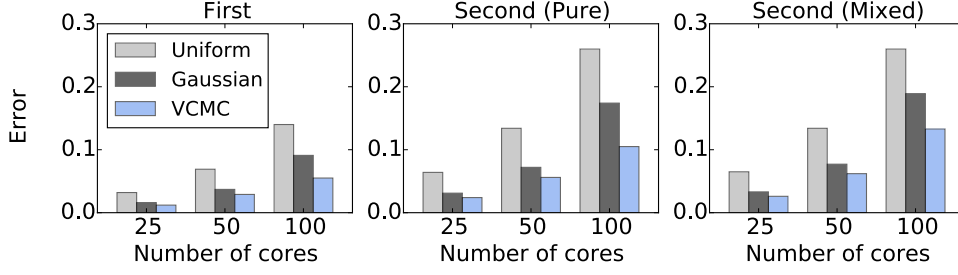

Figure 6: Five-dimensional normal-inverse Wishart model ( $d = 5$ ). Moment approximation error for the uniform and Gaussian averaging baselines and VCMC, relative to serial MCMC. Letting  $\rho_j$  denote the  $j^{\text{th}}$  largest eigenvalue of  $\Lambda^{-1}$ , we assessed three groups of functions: (*left*) first moments, with  $f(\Lambda) = \rho_j$  for  $1 \leq j \leq d$ ; (*center*) pure second moments, with  $f(\Lambda) = \rho_j^2$  for  $1 \leq j \leq d$ ; and (*right*) mixed second moments, with  $f(\Lambda) = \rho_i \rho_j$  for  $1 \leq i < j \leq d$ .
